# Supplementary material for: Identification of genes related to high royal jelly production in the honey bee (Apis mellifera) using microarray analysis
Source: PubMed Central journal article supplement (PMC5738612; doi:10.1590/1678-4685-gmb-2017-0013), 2017-10-02
Supplement: 1415-4757-gmb-1678-4685-GMB-2017-0013-Suppl03.pdf [file 1415-4757-gmb-1678-4685-GMB-2017-0013-Suppl03.pdf]

**Supplementary Material to “Identification of genes related to high royal jelly production in the honey bee  
(*Apis mellifera*) using microarray analysis”**

**Table S3.** Primer pairs for qRT-PCR.

| GI        | Gene name                                                                                                    | Forward                 | Reverse                | Produce size (bp) |
|-----------|--------------------------------------------------------------------------------------------------------------|-------------------------|------------------------|-------------------|
| 20336614  | dopamine receptor type D2 (Dop2)                                                                             | ATCTGTTGGCTACCTTTCTTCG  | AACGCTCTACGAAAATCTCTGC | 167               |
| 67043607  | Amt-2-like protein                                                                                           | ATAGGATTTTTGCTGGCTGGT   | TACATTCTTCGCATCCATC    | 84                |
| 110755554 | similar to CG8862-PA (LOC551715)                                                                             | AGTGGTTGGTATCTGGGAAAGT  | GTAGGAAGTCTGCCGAAAC    | 146               |
| 149939402 | clone hex71 hexamerin (hex71)                                                                                | AGTATGGCTGGTTGGCTTATTG  | CGATGTTGGCTTCTATGTTCC  | 191               |
| 110759535 | hypothetical protein LOC726515 (LOC726515)                                                                   | AGATCCTAAAAATGGAATTGTGC | CCTCCAAGAACAAGCATTGGA  | 195               |
| 110750767 | similar to lethal (1) G0168 CG33206-PA, isoform A(LOC411348)                                                 | AACATCAGTGCCTTCAAAACG   | CTTCGCTCTCTCCGTTCTTT   | 213               |
| 66520065  | similar to SHC-adaptor protein CG3715-PA (LOC412172)                                                         | CACCAGTTCACCTTTACCAA    | CAGTTTCTGCCCATTTGAT    | 162               |
| 110749006 | similar to CG1998-PA, transcript variant 1 (LOC409360)                                                       | GGCAAGCACAATGGGATAAA    | TGTAATCCCGCCAAAGAAC    | 117               |
| 110760992 | similar to LDLa domain containing chitin binding protein 1 CG8756-PD, im D, transcript variant 1 (LOC551323) | CAACACAAGTCAGAGCACAGG   | GCTTGCTTTGTGCGCATCTTAC | 149               |
| 66538119  | similar to Multidrug resistance-associated protein 5 (LOC413947)                                             | TAATGGCGGAAATAGAACTCG   | TGCTCCTGTTGCTCCTACAATA | 248               |
