# Supplementary material for: Identification of genes related to high royal jelly production in the honey bee (Apis mellifera) using microarray analysis
Source: PubMed Central journal article supplement (PMC5738612; doi:10.1590/1678-4685-gmb-2017-0013), 2017-10-02
Supplement: 1415-4757-gmb-1678-4685-GMB-2017-0013-Suppl04.pdf [file 1415-4757-gmb-1678-4685-GMB-2017-0013-Suppl04.pdf]

**Supplementary Material to “Identification of genes related to high royal jelly production in the honey bee  
(*Apis mellifera*) using microarray analysis”**

**Table S4.** Information of 369 differentially expressed genes screened by gene chip

| probe_ID              | Accessions   | avg_HRJB<br>(log2signal) | avg_LRJB<br>(log2signal) | Ratio | Expression<br>change | Target Description                                                                |
|-----------------------|--------------|--------------------------|--------------------------|-------|----------------------|-----------------------------------------------------------------------------------|
| CUST_5397_PI416562355 | GI:110760357 | 4.618                    | 3.351                    | 2.406 | Up                   | <i>Apis mellifera</i> nodal modulator 2-like, transcript variant 1 (LOC725048)    |
| CUST_8371_PI416562355 | GI:110767541 | 6.774                    | 4.983                    | 3.461 | Up                   | similar to CG33257-PA (LOC412520)                                                 |
| CUST_9776_PI416562355 | GI:226446422 | 11.033                   | 9.209                    | 3.540 | Up                   | <i>Apis mellifera</i> clone HSP90e heat shock protein 90                          |
| CUST_4355_PI416562355 | GI:110758302 | 6.028                    | 4.891                    | 2.200 | Up                   | <i>Apis mellifera</i> small G protein signaling modulator 3 homolog (LOC411540)   |
| CUST_898_PI416568369  | \            | 3.600                    | 2.064                    | 2.901 | Up                   | \                                                                                 |
| CUST_1572_PI416568369 | \            | 3.002                    | 1.939                    | 2.090 | Up                   | \                                                                                 |
| CUST_3918_PI416562355 | GI:110757407 | 9.682                    | 8.659                    | 2.033 | Up                   | <i>Apis mellifera</i> paramyosin, long form-like (LOC409787)                      |
| CUST_8510_PI416562355 | GI:110768094 | 4.671                    | 3.264                    | 2.652 | Up                   | <i>Apis mellifera</i> hypothetical protein LOC412112 (LOC412112)                  |
| CUST_2254_PI416562355 | GI:110750767 | 7.662                    | 6.321                    | 2.533 | Up                   | <i>Apis mellifera</i> thyroid receptor-interacting protein 11 (LOC411348)         |
| CUST_3287_PI416562355 | GI:110756174 | 7.852                    | 6.710                    | 2.206 | Up                   | <i>Apis mellifera</i> vacuolar protein sorting 28 (Vps28)                         |
| CUST_778_PI416562355  | GI:66520065  | 5.356                    | 4.160                    | 2.291 | Up                   | <i>Apis mellifera</i> SHC-transforming protein 1 (LOC412172)                      |
| CUST_7906_PI416562355 | GI:110765957 | 4.178                    | 2.709                    | 2.767 | Up                   | <i>Apis mellifera</i> similar to Guanine nucleotide-releasing protein (LOC726901) |
| CUST_6919_PI416562355 | GI:110763356 | 5.101                    | 3.125                    | 3.934 | Up                   | <i>Apis mellifera</i> uncharacterized LOC726155 (LOC726155)                       |

| probe_ID              | Accessions   | avg_HRJB<br>(log2signal) | avg_LRJB<br>(log2signal) | Ratio | Expression<br>change | Target Description                                                                                          |
|-----------------------|--------------|--------------------------|--------------------------|-------|----------------------|-------------------------------------------------------------------------------------------------------------|
| CUST_6572_Pi416562355 | GI:110762694 | 7.894                    | 6.760                    | 2.195 | Up                   | <i>Apis mellifera</i> probable leucyl-tRNA synthetase, mitochondrial-like, transcript variant 2 (LOC552532) |
| CUST_6892_Pi416562355 | GI:110763305 | 3.855                    | 2.388                    | 2.765 | Up                   | <i>Apis mellifera</i> similar to dynein, axonemal, heavy chain 8 (LOC724774), mRNA                          |
| CUST_7104_Pi416562355 | GI:110763681 | 7.238                    | 6.017                    | 2.330 | Up                   | <i>Apis mellifera</i> cuticular protein CPF2 (CPF2)                                                         |
| CUST_6272_Pi416562355 | GI:110762080 | 6.144                    | 4.753                    | 2.623 | Up                   | similar to CG2811-PA (LOC550955)                                                                            |
| CUST_8661_Pi416562355 | GI:110768697 | 8.941                    | 7.322                    | 3.070 | Up                   | <i>Apis mellifera</i> similar to ribosomal protein L5 (LOC726004)                                           |
| CUST_6807_Pi416562355 | GI:110763160 | 5.356                    | 4.316                    | 2.057 | Up                   | <i>Apis mellifera</i> protein RFT1 homolog (LOC412489)                                                      |
| CUST_9067_Pi416562355 | GI:110772770 | 4.064                    | 2.916                    | 2.215 | Up                   | <i>Apis mellifera</i> similar to CG2989-PA (LOC726402)                                                      |
| CUST_5871_Pi416562355 | GI:110761255 | 5.476                    | 4.122                    | 2.555 | Up                   | <i>Apis mellifera</i> similar to CG9776-PA, isoform A (LOC413337)                                           |
| CUST_7279_Pi416562355 | GI:110764025 | 3.561                    | 2.222                    | 2.530 | Up                   | <i>Apis mellifera</i> protein kinase D, transcript variant 2 (PKD)                                          |
| CUST_1503_Pi416562355 | GI:110748853 | 7.010                    | 5.538                    | 2.773 | Up                   | <i>Apis mellifera</i> protein ABHD11-like (LOC414038)                                                       |
| CUST_3207_Pi416562355 | GI:110756036 | 6.082                    | 4.936                    | 2.212 | Up                   | <i>Apis mellifera</i> similar to Suchb CG10622-PA, isoform A (LOC725169)                                    |
| CUST_1504_Pi416568369 | \            | 3.702                    | 2.394                    | 2.477 | Up                   | \                                                                                                           |
| CUST_4150_Pi416562355 | GI:110757840 | 4.078                    | 2.959                    | 2.172 | Up                   | <i>Apis mellifera</i> similar to expanded CG4114-PA (LOC409898)                                             |
| CUST_7206_Pi416562355 | GI:110763898 | 7.278                    | 5.926                    | 2.553 | Up                   | <i>Apis mellifera</i> guanine nucleotide-binding protein-like 3 homolog (LOC724161)                         |
| CUST_2842_Pi416562355 | GI:110755310 | 5.839                    | 4.777                    | 2.088 | Up                   | <i>Apis mellifera</i> mitochondrial ubiquitin ligase activator of nfkb 1-like (LOC409295)                   |
| CUST_452_Pi416568369  | \            | 3.649                    | 2.587                    | 2.088 | Up                   | \                                                                                                           |
| CUST_1586_Pi416562355 | GI:110749006 | 6.130                    | 5.039                    | 2.130 | Up                   | similar to CG1998-PA, transcript variant 1 (LOC409360)                                                      |
| CUST_3045_Pi416562355 | GI:110755733 | 7.271                    | 6.232                    | 2.054 | Up                   | <i>Apis mellifera</i> cleft lip and palate transmembrane protein 1 homolog (LOC727027)                      |
| CUST_1545_Pi416562355 | GI:110748930 | 4.920                    | 3.645                    | 2.420 | Up                   | <i>Apis mellifera</i> WD repeat-containing protein 66-like (LOC413693)                                      |
| CUST_4820_Pi416562355 | GI:110759190 | 10.446                   | 9.217                    | 2.345 | Up                   | <i>Apis mellifera</i> myosin heavy chain 1, transcript variant 1 (Mhc1)                                     |
| CUST_1493_Pi416562355 | GI:110748835 | 7.732                    | 6.723                    | 2.013 | Up                   | <i>Apis mellifera</i> vacuolar protein sorting-associated protein 37B (LOC724720)                           |
| CUST_9160_Pi416562355 | GI:110773542 | 3.038                    | 1.592                    | 2.724 | Up                   | <i>Apis mellifera</i> similar to kynurenine aminotransferase III isoform 1 (LOC727352)                      |
| CUST_6070_Pi416562355 | GI:110761686 | 8.238                    | 6.759                    | 2.788 | Up                   | <i>Apis mellifera</i> prostaglandin reductase 1-like (LOC411378)                                            |

| probe_ID              | Accessions   | avg_HRJB<br>(log2signal) | avg_LRJB<br>(log2signal) | Ratio | Expression<br>change | Target Description                                                                               |
|-----------------------|--------------|--------------------------|--------------------------|-------|----------------------|--------------------------------------------------------------------------------------------------|
| CUST_907_P1416568369  | \            | 3.778                    | 2.653                    | 2.181 | Up                   | \                                                                                                |
| CUST_430_P1416562355  | GI:66501029  | 6.969                    | 5.919                    | 2.070 | Up                   | <i>Apis mellifera</i> actin-related protein 2 (LOC409313)                                        |
| CUST_6902_P1416562355 | GI:110763328 | 6.781                    | 5.478                    | 2.468 | Up                   | <i>Apis mellifera</i> sideroflexin-3 (LOC408539)                                                 |
| CUST_1209_P1416562355 | GI:66558844  | 5.714                    | 4.600                    | 2.164 | Up                   | <i>Apis mellifera</i> breast cancer metastasis-suppressor 1-like protein (LOC552686)             |
| CUST_1464_P1416562355 | GI:20336614  | 4.057                    | 2.892                    | 2.243 | Up                   | <i>Apis mellifera</i> dopamine receptor type D2 (Dop2)                                           |
| CUST_9588_P1416562355 | GI:110778049 | 6.182                    | 5.139                    | 2.061 | Up                   | <i>Apis mellifera</i> hedgehog-like (LOC726929)                                                  |
| CUST_906_P1416568369  | \            | 4.045                    | 2.736                    | 2.476 | Up                   | \                                                                                                |
| CUST_840_P1416562355  | GI:66523499  | 7.660                    | 6.187                    | 2.776 | Up                   | <i>Apis mellifera</i> aminomethyltransferase, mitochondrial-like (LOC410550)                     |
| CUST_1362_P1416562355 | GI:90194187  | 7.498                    | 5.853                    | 3.129 | Up                   | <i>Apis mellifera</i> OBP14                                                                      |
| CUST_3690_P1416562355 | GI:110756945 | 3.531                    | 2.001                    | 2.888 | Up                   | <i>Apis mellifera</i> solute carrier family 35 member G1-like (LOC724388)                        |
| CUST_6444_P1416562355 | GI:110762426 | 3.718                    | 2.393                    | 2.505 | Up                   | similar to CG14446-PA (LOC408403)                                                                |
| CUST_9545_P1416562355 | GI:110777694 | 6.744                    | 5.389                    | 2.557 | Up                   | <i>Apis mellifera</i> apolipoprotein D (LOC409278)                                               |
| CUST_1708_P1416562355 | GI:110749242 | 8.655                    | 7.379                    | 2.421 | Up                   | <i>Apis mellifera</i> COX10 homolog, cytochrome c oxidase assembly protein (Cox10)               |
| CUST_2230_P1416562355 | GI:110750712 | 3.936                    | 2.745                    | 2.284 | Up                   | <i>Apis mellifera</i> homer protein homolog 2 (LOC413278)                                        |
| CUST_8919_P1416562355 | GI:110771413 | 3.574                    | 2.497                    | 2.109 | Up                   | <i>Apis mellifera</i> similar to Axin (Axis inhibition protein) (dAxin) (d-Axin) (LOC727586)     |
| CUST_8758_P1416562355 | GI:110769764 | 4.795                    | 3.571                    | 2.336 | Up                   | <i>Apis mellifera</i> similar to SMC6 protein (LOC727559)                                        |
| CUST_1453_P1416568369 | \            | 4.188                    | 2.606                    | 2.994 | Up                   | \                                                                                                |
| CUST_670_P1416568369  | \            | 3.391                    | 2.387                    | 2.006 | Up                   | \                                                                                                |
| CUST_6241_P1416562355 | GI:110762029 | 7.811                    | 6.446                    | 2.577 | Up                   | <i>Apis mellifera</i> endoplasmic reticulum resident protein 44 (LOC552191)                      |
| CUST_8096_P1416562355 | GI:110766478 | 3.464                    | 2.112                    | 2.552 | Up                   | similar to ADP/ATP translocase 1 (LOC726168);                                                    |
| CUST_1249_P1416562355 | GI:66563289  | 9.561                    | 8.123                    | 2.709 | Up                   | <i>Apis mellifera</i> T-complex protein 1 subunit gamma (LOC409296)                              |
| CUST_491_P1416562355  | GI:66506313  | 7.119                    | 6.040                    | 2.113 | Up                   | <i>Apis mellifera</i> similar to Probable UDP-glucose 4-epimerase (Galactowaldenase) (LOC411633) |

| probe_ID              | Accessions   | avg_HRJB<br>(log2signal) | avg_LRJB<br>(log2signal) | Ratio | Expression<br>change | Target Description                                                                              |
|-----------------------|--------------|--------------------------|--------------------------|-------|----------------------|-------------------------------------------------------------------------------------------------|
| CUST_5718_Pi416562355 | GI:110760992 | 7.699                    | 6.517                    | 2.268 | Up                   | <i>Apis mellifera</i> uncharacterized LOC551323 (LOC551323)                                     |
| CUST_6235_Pi416562355 | GI:110762019 | 6.507                    | 5.445                    | 2.088 | Up                   | <i>Apis mellifera</i> mitochondrial 2-oxoglutarate/malate carrier protein-like (LOC552016)      |
| CUST_8541_Pi416562355 | GI:110768200 | 7.345                    | 6.310                    | 2.050 | Up                   | <i>Apis mellifera</i> solute carrier family 25 member 40-like, transcript variant 1 (LOC551301) |
| CUST_8132_Pi416562355 | GI:110766565 | 6.390                    | 5.183                    | 2.308 | Up                   | <i>Apis mellifera</i> jumonji, AT rich interactive domain 2 (Jarid2)                            |
| CUST_1104_Pi416562355 | GI:66550504  | 5.095                    | 4.065                    | 2.042 | Up                   | <i>Apis mellifera</i> cytochrome c oxidase assembly factor 7 homolog (LOC552586)                |
| CUST_1844_Pi416562355 | GI:110749527 | 3.762                    | 2.508                    | 2.385 | Up                   | <i>Apis mellifera</i> integrin alpha-8-like (LOC725946)                                         |
| CUST_5570_Pi416562355 | GI:110760713 | 5.075                    | 3.889                    | 2.275 | Up                   | <i>Apis mellifera</i> DISCO interacting protein 2 (DIP2)                                        |
| CUST_9755_Pi416562355 | GI:218749840 | 7.644                    | 6.277                    | 2.580 | Up                   | <i>Apis mellifera</i> uncharacterized LOC551408 (LOC551408)                                     |
| CUST_965_Pi416562355  | GI:66532762  | 3.816                    | 2.796                    | 2.028 | Up                   | <i>Apis mellifera</i> tachykinin-like peptides receptor 99D (LOC411611)                         |
| CUST_7858_Pi416562355 | GI:110765844 | 7.164                    | 6.049                    | 2.166 | Up                   | <i>Apis mellifera</i> protein polybromo-1 (LOC552677)                                           |
| CUST_9152_Pi416562355 | GI:110773461 | 4.763                    | 3.712                    | 2.072 | Up                   | <i>Apis mellifera</i> LAG1 longevity assurance homolog 2-like (LOC727082)                       |
| CUST_1009_Pi416562355 | GI:66538119  | 6.496                    | 5.463                    | 2.046 | Up                   | <i>Apis mellifera</i> ATP-binding cassette, sub-family C (CFTR/MRP), member 5 (ABCC5)           |
| CUST_678_Pi416562355  | GI:66515675  | 3.726                    | 2.717                    | 2.012 | Up                   | <i>Apis mellifera</i> serine/threonine/tyrosine-interacting protein-like (LOC411320)            |
| CUST_3535_Pi416562355 | GI:110756674 | 3.896                    | 2.842                    | 2.077 | Up                   | <i>Apis mellifera</i> armadillo repeat-containing protein 7-like (LOC412188)                    |
| CUST_4271_Pi416562355 | GI:110758136 | 3.140                    | 2.016                    | 2.179 | Up                   | <i>Apis mellifera</i> hypothetical protein LOC725019 (LOC725019)                                |
| CUST_9355_Pi416562355 | GI:110775710 | 5.846                    | 4.730                    | 2.167 | Up                   | <i>Apis mellifera</i> transmembrane protein 35 (LOC551755)                                      |
| CUST_9356_Pi416562355 | GI:110775718 | 4.008                    | 2.103                    | 3.744 | Up                   | <i>Apis mellifera</i> similar to carbonic anhydrase II (LOC727217)                              |
| CUST_232_Pi416568369  | \            | 3.869                    | 2.551                    | 2.492 | Up                   | \                                                                                               |
| CUST_6634_Pi416562355 | GI:110762803 | 5.591                    | 4.297                    | 2.452 | Up                   | <i>Apis mellifera</i> synaptic vesicle glycoprotein 2B-like (LOC412941)                         |
| CUST_5738_Pi416562355 | GI:110761027 | 5.278                    | 4.221                    | 2.080 | Up                   | <i>Apis mellifera</i> similar to CG32705-PA (LOC551683)                                         |
| CUST_70_Pi416562355   | GI:18140744  | 9.819                    | 8.802                    | 2.024 | Up                   | <i>Apis mellifera</i> odorant binding protein 4                                                 |
| CUST_5813_Pi416562355 | GI:110761156 | 3.867                    | 2.772                    | 2.137 | Up                   | <i>Apis mellifera</i> similar to CG13136-PA (LOC724726)                                         |
| CUST_1392_Pi416568369 | \            | 3.305                    | 1.922                    | 2.608 | Up                   | \                                                                                               |

| probe_ID              | Accessions   | avg_HRJB<br>(log2signal) | avg_LRJB<br>(log2signal) | Ratio | Expression<br>change | Target Description                                                                     |
|-----------------------|--------------|--------------------------|--------------------------|-------|----------------------|----------------------------------------------------------------------------------------|
| CUST_4219_P1416562355 | GI:110758023 | 8.223                    | 7.148                    | 2.107 | Up                   | <i>Apis mellifera</i> proteasome 25kD subunit (Pros25)                                 |
| CUST_6419_P1416562355 | GI:110762356 | 5.203                    | 3.997                    | 2.308 | Up                   | <i>Apis mellifera</i> long-chain-fatty-acid--CoA ligase 1-like (LOC412541)             |
| CUST_3369_P1416562355 | GI:110756310 | 9.031                    | 7.930                    | 2.145 | Up                   | <i>Apis mellifera</i> ribosomal protein L40 (RpL40)                                    |
| CUST_5031_P1416562355 | GI:110759633 | 6.509                    | 5.014                    | 2.819 | Up                   | <i>Apis mellifera</i> hypothetical protein LOC551133 (LOC551133)                       |
| CUST_123_P1416562355  | GI:34101242  | 4.561                    | 3.340                    | 2.331 | Up                   | <i>Apis mellifera</i> complementary sex determiner (csd)                               |
| CUST_279_P1416568369  | \            | 3.467                    | 2.372                    | 2.136 | Up                   | \                                                                                      |
| CUST_511_P1416568369  | \            | 3.828                    | 2.660                    | 2.247 | Up                   | \                                                                                      |
| CUST_1647_P1416562355 | GI:110749120 | 3.699                    | 2.616                    | 2.118 | Up                   | <i>Apis mellifera</i> similar to CG9514-PA (LOC724116)                                 |
| CUST_8653_P1416562355 | GI:110768669 | 3.442                    | 2.213                    | 2.344 | Up                   | <i>Apis mellifera</i> similar to CG10252-PA (LOC725443)                                |
| CUST_454_P1416568369  | \            | 10.371                   | 9.364                    | 2.010 | Up                   | \                                                                                      |
| CUST_7955_P1416562355 | GI:110766100 | 4.894                    | 3.802                    | 2.132 | Up                   | <i>Apis mellifera</i> similar to CG33722-PC, isoform C (LOC727144)                     |
| CUST_5402_P1416562355 | GI:110760365 | 7.673                    | 6.396                    | 2.424 | Up                   | <i>Apis mellifera</i> hypothetical protein LOC408285, transcript variant 1 (LOC408285) |
| CUST_737_P1416568369  | \            | 3.838                    | 2.534                    | 2.468 | Up                   | \                                                                                      |
| CUST_1062_P1416568369 | \            | 3.558                    | 2.495                    | 2.090 | Up                   | \                                                                                      |
| CUST_856_P1416568369  | \            | 3.680                    | 2.455                    | 2.338 | Up                   | \                                                                                      |
| CUST_806_P1416568369  | \            | 4.033                    | 3.027                    | 2.009 | Up                   | \                                                                                      |
| CUST_333_P1416568369  | \            | 3.972                    | 2.245                    | 3.309 | Up                   | \                                                                                      |
| CUST_3522_P1416562355 | GI:110756648 | 6.632                    | 5.424                    | 2.310 | Up                   | <i>Apis mellifera</i> 40S ribosomal protein S29-like (LOC725147)                       |
| CUST_8054_P1416562355 | GI:110766354 | 7.543                    | 6.405                    | 2.202 | Up                   | <i>Apis mellifera</i> similar to CG14482-PA (LOC726777)                                |
| CUST_8741_P1416562355 | GI:110769534 | 5.627                    | 4.541                    | 2.122 | Up                   | <i>Apis mellifera</i> hypothetical protein LOC727095 (LOC727095)                       |
| CUST_989_P1416568369  | \            | 3.656                    | 2.501                    | 2.226 | Up                   | \                                                                                      |
| CUST_4087_P1416562355 | GI:110757718 | 5.065                    | 3.987                    | 2.112 | Up                   | <i>Apis mellifera</i> cGMP-dependent 3',5'-cyclic phosphodiesterase-like (LOC412573)   |
| CUST_6428_P1416562355 | GI:110762371 | 10.384                   | 9.294                    | 2.127 | Up                   | <i>Apis mellifera</i> cytochrome P450 6AS11 (CYP6AS11)                                 |
| CUST_4502_P1416562355 | GI:110758627 | 10.368                   | 9.272                    | 2.138 | Up                   | <i>Apis mellifera</i> transmembrane emp24 domain-containing protein bai (LOC409026)    |

| probe_ID              | Accessions   | avg_HRJB<br>(log2signal) | avg_LRJB<br>(log2signal) | Ratio | Expression<br>change | Target Description                                                                 |
|-----------------------|--------------|--------------------------|--------------------------|-------|----------------------|------------------------------------------------------------------------------------|
| CUST_3279_PI416562355 | GI:110756160 | 4.157                    | 2.761                    | 2.632 | Up                   | similar to bcn92 CG3717-PA (LOC725865)                                             |
| CUST_5512_PI416562355 | GI:110760603 | 6.968                    | 5.841                    | 2.184 | Up                   | <i>Apis mellifera</i> ribosomal L1 domain-containing protein 1-like (LOC551532)    |
| CUST_4771_PI416562355 | GI:110759097 | 5.346                    | 3.157                    | 4.559 | Up                   | <i>Apis mellifera</i> uncharacterized LOC725454 (LOC725454)                        |
| CUST_2707_PI416562355 | GI:110755076 | 4.386                    | 3.255                    | 2.191 | Up                   | <i>Apis mellifera</i> Myb-interacting protein 40 (mip40)                           |
| CUST_6115_PI416562355 | GI:110761760 | 7.949                    | 6.795                    | 2.226 | Up                   | <i>Apis mellifera</i> similar to interferon gamma inducible protein 30 (LOC726203) |
| CUST_1500_PI416568369 | \            | 3.071                    | 1.888                    | 2.270 | Up                   | \                                                                                  |
| CUST_4188_PI416562355 | GI:110757965 | 4.042                    | 2.902                    | 2.204 | Up                   | <i>Apis mellifera</i> jerky protein homolog-like (LOC724817)                       |
| CUST_1213_PI416568369 | \            | 3.351                    | 2.341                    | 2.014 | Up                   | \                                                                                  |
| CUST_1618_PI416568369 | \            | 3.811                    | 2.803                    | 2.011 | Up                   | \                                                                                  |
| CUST_9786_PI416562355 | GI:229892247 | 11.811                   | 10.598                   | 2.319 | Up                   | <i>Apis mellifera</i> heat shock protein 90 (Hsp90)                                |
| CUST_3945_PI416562355 | GI:110757459 | 12.364                   | 11.306                   | 2.081 | Up                   | <i>Apis mellifera</i> polyubiquitin-A (LOC409675), transcript variant X1           |
| CUST_1023_PI416562355 | GI:66541235  | 3.836                    | 2.777                    | 2.083 | Up                   | <i>Apis mellifera</i> ionotropic receptor 93a-like protein (LOC551697)             |
| CUST_9_PI416562355    | GI:433530    | 10.381                   | 9.171                    | 2.314 | Up                   | major royal jelly protein 4 [ <i>Apis mellifera</i> ]                              |
| CUST_1228_PI416568369 | \            | 3.500                    | 2.412                    | 2.126 | Up                   | \                                                                                  |
| CUST_5547_PI416562355 | GI:110760674 | 6.806                    | 5.806                    | 2.000 | Up                   | <i>Apis mellifera</i> uncharacterized LOC724335 (LOC724335)                        |
| CUST_6922_PI416562355 | GI:110763362 | 3.475                    | 2.378                    | 2.139 | Up                   | <i>Apis mellifera</i> uncharacterized LOC726229 (LOC726229)                        |
| CUST_7909_PI416562355 | GI:110765966 | 6.500                    | 5.329                    | 2.251 | Up                   | <i>Apis mellifera</i> sec1 family domain-containing protein 2-like (LOC552681)     |
| CUST_7298_PI416562355 | GI:110764060 | 5.337                    | 4.171                    | 2.244 | Up                   | <i>Apis mellifera</i> protein FAM192A-like (LOC726096)                             |
| CUST_347_PI416568369  | \            | 3.783                    | 2.205                    | 2.985 | Up                   | \                                                                                  |
| CUST_3513_PI416562355 | GI:110756631 | 4.215                    | 2.899                    | 2.490 | Up                   | <i>Apis mellifera</i> kinesin 3D, transcript variant 2 (kinesin-3D)                |
| CUST_5970_PI416562355 | GI:110761453 | 3.735                    | 2.728                    | 2.010 | Up                   | <i>Apis mellifera</i> similar to Odorant receptor 24a CG11767-PA (LOC727671)       |
| CUST_1485_PI416568369 | \            | 3.750                    | 2.605                    | 2.211 | Up                   | \                                                                                  |
| CUST_4124_PI416562355 | GI:110757783 | 3.686                    | 2.584                    | 2.147 | Up                   | <i>Apis mellifera</i> hypothetical protein LOC725513 (LOC725513)                   |

| probe_ID              | Accessions   | avg_HRJB<br>(log2signal) | avg_LRJB<br>(log2signal) | Ratio | Expression<br>change | Target Description                                                                 |
|-----------------------|--------------|--------------------------|--------------------------|-------|----------------------|------------------------------------------------------------------------------------|
| CUST_1136_P1416568369 | \            | 4.219                    | 3.016                    | 2.301 | Up                   | \                                                                                  |
| CUST_9134_P1416562355 | GI:110773276 | 6.976                    | 5.945                    | 2.044 | Up                   | <i>Apis mellifera</i> e3 ubiquitin-protein ligase TRIM23-like (LOC409166)          |
| CUST_3851_P1416562355 | GI:110757223 | 3.181                    | 2.072                    | 2.156 | Up                   | <i>Apis mellifera</i> iroquois-class homeodomain protein IRX-6-like (LOC726999)    |
| CUST_3591_P1416562355 | GI:110756771 | 4.404                    | 2.706                    | 3.244 | Up                   | <i>Apis mellifera</i> septin-7 (LOC725834), transcript variant X1                  |
| CUST_8441_P1416562355 | GI:110767812 | 11.449                   | 10.323                   | 2.184 | Up                   | <i>Apis mellifera</i> probable Bax inhibitor 1 (LOC552282)                         |
| CUST_904_P1416562355  | GI:66529172  | 5.360                    | 3.886                    | 2.779 | Up                   | <i>Apis mellifera</i> sister chromatid cohesion protein PDS5 homolog B (LOC551462) |
| CUST_7176_P1416562355 | GI:110763844 | 8.725                    | 7.659                    | 2.094 | Up                   | <i>Apis mellifera</i> 60 kDa heat shock protein, mitochondrial-like (LOC409384)    |
| CUST_79_P1416562355   | GI:21321073  | 7.139                    | 6.108                    | 2.043 | Up                   | <i>Apis mellifera</i> Mb-62 mRNA                                                   |
| CUST_850_P1416568369  | \            | 3.435                    | 2.330                    | 2.151 | Up                   | \                                                                                  |
| CUST_2366_P1416562355 | GI:110750980 | 3.412                    | 2.339                    | 2.104 | Up                   | <i>Apis mellifera</i> odorant receptor 22 (Or22)                                   |
| CUST_1461_P1416562355 | GI:110748773 | 3.931                    | 2.736                    | 2.290 | Up                   | <i>Apis mellifera</i> pre-mRNA-splicing factor CWC22 homolog (LOC724331)           |
| CUST_1425_P1416568369 | \            | 3.966                    | 2.532                    | 2.703 | Up                   | \                                                                                  |
| CUST_1287_P1416562355 | GI:67043607  | 4.135                    | 2.945                    | 2.281 | Up                   | <i>Apis mellifera</i> Amt-2-like protein                                           |
| CUST_2641_P1416562355 | GI:110754958 | 5.132                    | 3.618                    | 2.856 | Up                   | <i>Apis mellifera</i> thymidylate kinase (LOC552148)                               |
| CUST_6813_P1416562355 | GI:110763171 | 3.930                    | 2.719                    | 2.315 | Up                   | <i>Apis mellifera</i> hypothetical protein LOC409090 (LOC409090)                   |
| CUST_677_P1416562355  | GI:66515668  | 4.423                    | 3.343                    | 2.115 | Up                   | <i>Apis mellifera</i> CG1567-like (LOC411317)                                      |
| CUST_5014_P1416562355 | GI:110759599 | 4.516                    | 3.134                    | 2.605 | Up                   | <i>Apis mellifera</i> neuroligin 1 (NLG-1)                                         |
| CUST_3700_P1416562355 | GI:110756960 | 11.043                   | 9.955                    | 2.126 | Up                   | <i>Apis mellifera</i> glucose dehydrogenase [FAD, quinone] (LOC551044)             |
| CUST_2338_P1416562355 | GI:110750931 | 4.305                    | 2.713                    | 3.016 | Up                   | <i>Apis mellifera</i> striatin-interacting protein 1 (LOC412331)                   |
| CUST_4776_P1416562355 | GI:110759106 | 8.782                    | 7.419                    | 2.574 | Up                   | <i>Apis mellifera</i> hypothetical LOC552685 (LOC552685)                           |
| CUST_609_P1416568369  | \            | 3.603                    | 2.486                    | 2.169 | Up                   | \                                                                                  |
| CUST_4385_P1416562355 | GI:110758358 | 4.158                    | 2.819                    | 2.530 | Up                   | <i>Apis mellifera</i> forkhead box protein K2-like (LOC726050)                     |
| CUST_917_P1416568369  | \            | 9.852                    | 8.708                    | 2.211 | Up                   | \                                                                                  |
| CUST_2940_P1416562355 | GI:110755490 | 4.347                    | 2.989                    | 2.564 | Up                   | <i>Apis mellifera</i> similar to adrift CG5032-PA (LOC413775)                      |

| probe_ID              | Accessions   | avg_HRJB<br>(log2signal) | avg_LRJB<br>(log2signal) | Ratio | Expression<br>change | Target Description                                                                  |
|-----------------------|--------------|--------------------------|--------------------------|-------|----------------------|-------------------------------------------------------------------------------------|
| CUST_971_P1416568369  | \            | 4.147                    | 3.037                    | 2.159 | Up                   | \                                                                                   |
| CUST_1033_P1416568369 | \            | 3.721                    | 2.712                    | 2.012 | Up                   | \                                                                                   |
| CUST_7695_P1416562355 | GI:110764948 | 4.224                    | 3.058                    | 2.245 | Up                   | <i>Apis mellifera</i> similar to boule CG4760-PB, isoform B (LOC726917)             |
| CUST_3919_P1416562355 | GI:110757409 | 4.026                    | 2.706                    | 2.495 | Up                   | <i>Apis mellifera</i> uncharacterized protein KIAA0513 (LOC410135)                  |
| CUST_1259_P1416568369 | \            | 3.162                    | 2.135                    | 2.038 | Up                   | \                                                                                   |
| CUST_1621_P1416568369 | \            | 3.625                    | 2.623                    | 2.003 | Up                   | \                                                                                   |
| CUST_765_P1416568369  | \            | 3.945                    | 2.666                    | 2.427 | Up                   | \                                                                                   |
| CUST_3390_P1416562355 | GI:110756407 | 4.391                    | 3.285                    | 2.153 | Up                   | <i>Apis mellifera</i> DC-STAMP domain-containing protein 1-like (LOC724561)         |
| CUST_9651_P1416562355 | GI:149939402 | 8.027                    | 6.866                    | 2.236 | Up                   | <i>Apis mellifera</i> clone hex71 hexamerin                                         |
| CUST_2551_P1416562355 | GI:110751300 | 4.317                    | 3.070                    | 2.374 | Up                   | <i>Apis mellifera</i> acyl-CoA synthetase family member 4-like (LOC411766)          |
| CUST_85_P1416568369   | \            | 4.094                    | 2.626                    | 2.767 | Up                   | \                                                                                   |
| CUST_8941_P1416562355 | GI:110771577 | 3.755                    | 2.630                    | 2.180 | Up                   | <i>Apis mellifera</i> gem-associated protein 6-like (LOC725227)                     |
| CUST_9381_P1416562355 | GI:110776003 | 3.948                    | 2.890                    | 2.082 | Up                   | <i>Apis mellifera</i> similar to Wnt oncogene analog 2 CG1916-PA (LOC727397)        |
| CUST_4889_P1416562355 | GI:110759368 | 6.796                    | 5.794                    | 2.003 | Up                   | <i>Apis mellifera</i> aspartyl-tRNA synthetase, mitochondrial-like (LOC725136)      |
| CUST_191_P1416562355  | GI:48095000  | 4.024                    | 3.015                    | 2.012 | Up                   | <i>Apis mellifera</i> coiled-coil domain-containing protein 64 homolog (LOC410851)  |
| CUST_1255_P1416568369 | \            | 4.056                    | 2.938                    | 2.171 | Up                   | \                                                                                   |
| CUST_6223_P1416562355 | GI:110761996 | 6.882                    | 5.625                    | 2.390 | Up                   | <i>Apis mellifera</i> pyridoxine/pyridoxamine 5'-phosphate oxidase-like (LOC551533) |
| CUST_978_P1416562355  | GI:66533862  | 5.738                    | 4.518                    | 2.329 | Up                   | <i>Apis mellifera</i> N-sulphoglucosamine sulphohydrolase (LOC550884)               |
| CUST_81_P1416562355   | GI:22205093  | 5.420                    | 4.332                    | 2.125 | Up                   | <i>Apis mellifera</i> carnica mRNA for CREB 7 protein (creb gene)                   |
| CUST_3730_P1416562355 | GI:110757016 | 5.189                    | 3.956                    | 2.351 | Up                   | <i>Apis mellifera</i> pyrroline-5-carboxylate reductase 2 (LOC408859)               |
| CUST_8062_P1416562355 | GI:110766381 | 4.231                    | 3.084                    | 2.214 | Up                   | <i>Apis mellifera</i> similar to CG1124-PA (LOC726992)                              |
| CUST_5223_P1416562355 | GI:110760050 | 3.893                    | 2.839                    | 2.076 | Up                   | <i>Apis mellifera</i> mitochondrial pyruvate carrier 2-like (LOC724499)             |
| CUST_1526_P1416568369 | \            | 3.961                    | 2.565                    | 2.631 | Up                   | \                                                                                   |
| CUST_208_P1416568369  | \            | 4.365                    | 3.251                    | 2.165 | Up                   | \                                                                                   |



| probe_ID              | Accessions   | avg_HRJB<br>(log2signal) | avg_LRJB<br>(log2signal) | Ratio | Expression<br>change | Target Description                                                                              |
|-----------------------|--------------|--------------------------|--------------------------|-------|----------------------|-------------------------------------------------------------------------------------------------|
| CUST_1038_P1416568369 | \            | 3.374                    | 2.202                    | 2.253 | Up                   | \                                                                                               |
| CUST_6457_P1416562355 | GI:110762473 | 7.129                    | 6.080                    | 2.068 | Up                   | <i>Apis mellifera</i> coatomer subunit zeta-1 (LOC550981), transcript variant X4                |
| CUST_1992_P1416562355 | GI:110749813 | 5.543                    | 3.279                    | 4.803 | Up                   | <i>Apis mellifera</i> tyrosine-protein kinase-like otk-like (LOC410685)                         |
| CUST_4006_P1416562355 | GI:110757572 | 4.638                    | 3.566                    | 2.103 | Up                   | <i>Apis mellifera</i> krueppel (Kr)                                                             |
| CUST_2249_P1416562355 | GI:110750755 | 8.889                    | 7.830                    | 2.084 | Up                   | <i>Apis mellifera</i> uncharacterized LOC410087 (LOC410087)                                     |
| CUST_706_P1416568369  | \            | 3.932                    | 2.811                    | 2.176 | Up                   | \                                                                                               |
| CUST_619_P1416568369  | \            | 4.180                    | 3.132                    | 2.068 | Up                   | \                                                                                               |
| CUST_4812_P1416562355 | GI:110759177 | 5.432                    | 3.942                    | 2.810 | Up                   | <i>Apis mellifera</i> ribosome maturation protein SBDS-like (LOC413196)                         |
| CUST_1958_P1416562355 | GI:110749749 | 5.317                    | 3.713                    | 3.039 | Up                   | <i>Apis mellifera</i> putative adenosylhomocysteinase 3-like (LOC551762)                        |
| CUST_1627_P1416568369 | \            | 3.709                    | 2.664                    | 2.063 | Up                   | \                                                                                               |
| CUST_6539_P1416562355 | GI:110762637 | 4.627                    | 3.495                    | 2.191 | Up                   | <i>Apis mellifera</i> small wing (sl)                                                           |
| CUST_1567_P1416562355 | GI:110748972 | 8.585                    | 7.485                    | 2.144 | Up                   | <i>Apis mellifera</i> FK506-binding protein FKBP59 (FKBP59)                                     |
| CUST_7245_P1416562355 | GI:110763966 | 6.919                    | 5.919                    | 2.001 | Up                   | <i>Apis mellifera</i> uncharacterized LOC409514 (LOC409514)                                     |
| CUST_9785_P1416562355 | GI:229892213 | 10.480                   | 9.129                    | 2.551 | Up                   | <i>Apis mellifera</i> heat shock 70 kDa protein cognate 3 (Hsc70-3)                             |
| CUST_7890_P1416562355 | GI:110765921 | 9.127                    | 8.089                    | 2.053 | Up                   | <i>Apis mellifera</i> hypothetical protein LOC727504 (LOC727504)                                |
| CUST_162_P1416568369  | \            | 3.686                    | 2.594                    | 2.132 | Up                   | \                                                                                               |
| CUST_3659_P1416562355 | GI:110756888 | 4.449                    | 3.431                    | 2.026 | Up                   | <i>Apis mellifera</i> Wnt11 protein (Wnt11)                                                     |
| CUST_4522_P1416562355 | GI:110758661 | 6.009                    | 4.831                    | 2.262 | Up                   | <i>Apis mellifera</i> nucleolar protein 10 (LOC411240)                                          |
| CUST_8076_P1416562355 | GI:110766418 | 5.682                    | 4.665                    | 2.023 | Up                   | <i>Apis mellifera</i> similar to CG5155-PA (LOC412162)                                          |
| CUST_74_P1416568369   | \            | 3.618                    | 2.574                    | 2.062 | Up                   | \                                                                                               |
| CUST_3307_P1416562355 | GI:110756207 | 7.018                    | 5.025                    | 3.980 | Up                   | <i>Apis mellifera</i> coiled-coil domain-containing protein 123, mitochondrial-like (LOC726602) |
| CUST_4645_P1416562355 | GI:110758878 | 3.828                    | 2.820                    | 2.011 | Up                   | <i>Apis mellifera</i> basement membrane-specific heparan sulfate proteoglycan core              |

| probe_ID              | Accessions   | avg_HRJB<br>(log2signal) | avg_LRJB<br>(log2signal) | Ratio | Expression<br>change | Target Description                                                                            |
|-----------------------|--------------|--------------------------|--------------------------|-------|----------------------|-----------------------------------------------------------------------------------------------|
|                       |              |                          |                          |       |                      | protein-like (LOC409722)                                                                      |
| CUST_1555_P1416568369 | \            | 4.522                    | 3.356                    | 2.243 | Up                   | \                                                                                             |
| CUST_203_P1416562355  | GI:48095664  | 5.455                    | 3.348                    | 4.309 | Up                   | <i>Apis mellifera</i> similar to Ptx1 CG1447-PA, isoform A (LOC411029)                        |
| CUST_8065_P1416562355 | GI:110766386 | 4.541                    | 3.208                    | 2.520 | Up                   | <i>Apis mellifera</i> protein takeout-like (LOC727021)                                        |
| CUST_1866_P1416562355 | GI:110749567 | 5.594                    | 6.785                    | 0.438 | Down                 | <i>Apis mellifera</i> similar to CG31613-PA (LOC726542)                                       |
| CUST_1612_P1416568369 | \            | 2.251                    | 3.520                    | 0.415 | Down                 | \                                                                                             |
| CUST_2974_P1416562355 | GI:110755554 | 3.880                    | 4.897                    | 0.494 | Down                 | <i>Apis mellifera</i> endonuclease G, mitochondrial-like (LOC551715)                          |
| CUST_73_P1416562355   | GI:18265364  | 7.068                    | 8.072                    | 0.499 | Down                 | <i>Apis mellifera</i> Mb-113 mRNA                                                             |
| CUST_8769_P1416562355 | GI:110769807 | 3.778                    | 4.857                    | 0.474 | Down                 | <i>Apis mellifera</i> argininosuccinate lyase (LOC551670)                                     |
| CUST_4981_P1416562355 | GI:110759535 | 4.499                    | 5.772                    | 0.414 | Down                 | <i>Apis mellifera</i> uncharacterized protein C11orf70 homolog (LOC726515)                    |
| CUST_822_P1416568369  | \            | 2.853                    | 4.045                    | 0.438 | Down                 | \                                                                                             |
| CUST_7983_P1416562355 | GI:110766173 | 7.519                    | 8.744                    | 0.428 | Down                 | <i>Apis mellifera</i> 4-coumarate--CoA ligase 1 (LOC726362), transcript variant X1            |
| CUST_578_P1416562355  | GI:66511274  | 2.791                    | 4.025                    | 0.425 | Down                 | <i>Apis mellifera</i> protein mesh (LOC408878)                                                |
| CUST_2671_P1416562355 | GI:110755015 | 5.747                    | 6.989                    | 0.423 | Down                 | <i>Apis mellifera</i> WD repeat-containing protein 46-like (LOC724809), transcript variant X1 |
| CUST_371_P1416562355  | GI:66498986  | 3.970                    | 5.468                    | 0.354 | Down                 | <i>Apis mellifera</i> TATA-box-binding protein-like (LOC410753)                               |
| CUST_9235_P1416562355 | GI:110774378 | 4.355                    | 5.963                    | 0.328 | Down                 | <i>Apis mellifera</i> similar to CG10184-PA (LOC552565)                                       |
| CUST_289_P1416562355  | GI:48139532  | 3.462                    | 4.514                    | 0.482 | Down                 | <i>Apis mellifera</i> serine/threonine-protein kinase 32B-like (LOC413577)                    |
| CUST_8605_P1416562355 | GI:110768429 | 2.259                    | 3.684                    | 0.373 | Down                 | <i>Apis mellifera</i> hypothetical protein LOC727058 (LOC727058)                              |
| CUST_1588_P1416568369 | \            | 2.969                    | 3.996                    | 0.491 | Down                 | \                                                                                             |
| CUST_7570_P1416562355 | GI:110764666 | 7.777                    | 9.058                    | 0.411 | Down                 | <i>Apis mellifera</i> uncharacterized LOC552612 (LOC552612)                                   |
| CUST_8752_P1416562355 | GI:110769673 | 6.247                    | 7.442                    | 0.437 | Down                 | <i>Apis mellifera</i> choline/ethanolamine kinase-like (LOC411525)                            |
| CUST_9313_P1416562355 | GI:110775273 | 2.630                    | 3.837                    | 0.433 | Down                 | <i>Apis mellifera</i> pantothenate synthetase-like (LOC727315)                                |
| CUST_6089_P1416562355 | GI:110761718 | 4.738                    | 6.006                    | 0.415 | Down                 | <i>Apis mellifera</i> hypothetical protein LOC725157 (LOC725157)                              |

| probe_ID              | Accessions   | avg_HRJB<br>(log2signal) | avg_LRJB<br>(log2signal) | Ratio | Expression<br>change | Target Description                                                                                             |
|-----------------------|--------------|--------------------------|--------------------------|-------|----------------------|----------------------------------------------------------------------------------------------------------------|
| CUST_5748_Pi416562355 | GI:110761045 | 7.219                    | 8.227                    | 0.497 | Down                 | <i>Apis mellifera</i> chitinase domain-containing protein 1-like (LOC552683)                                   |
| CUST_9216_Pi416562355 | GI:110774174 | 3.169                    | 4.651                    | 0.358 | Down                 | <i>Apis mellifera</i> similar to SMC1 CG6057-PA (LOC727318)                                                    |
| CUST_8357_Pi416562355 | GI:110767469 | 5.151                    | 6.336                    | 0.440 | Down                 | <i>Apis mellifera</i> similar to CG17999-PA (LOC726751)                                                        |
| CUST_190_Pi416562355  | GI:48094802  | 4.674                    | 5.684                    | 0.497 | Down                 | <i>Apis mellifera</i> PHD finger protein 2-like (LOC410796)                                                    |
| CUST_3720_Pi416562355 | GI:110756996 | 3.895                    | 4.933                    | 0.487 | Down                 | <i>Apis mellifera</i> UPF0693 protein C10orf32 homolog (LOC725774)                                             |
| CUST_1278_Pi416562355 | GI:66565820  | 3.527                    | 4.674                    | 0.451 | Down                 | <i>Apis mellifera</i> similar to mindbomb homolog 1 (LOC412338)                                                |
| CUST_5937_Pi416562355 | GI:110761372 | 3.084                    | 4.090                    | 0.498 | Down                 | <i>Apis mellifera</i> similar to parathyroid hormone-responsive B1 gene (LOC726019)                            |
| CUST_6141_Pi416562355 | GI:110761805 | 5.948                    | 7.276                    | 0.398 | Down                 | <i>Apis mellifera</i> peroxiredoxin-6 (LOC411852)                                                              |
| CUST_2053_Pi416562355 | GI:110749918 | 2.236                    | 3.660                    | 0.373 | Down                 | <i>Apis mellifera</i> latrophilin Cirl-like (LOC552142)                                                        |
| CUST_2507_Pi416562355 | GI:110751228 | 4.832                    | 6.162                    | 0.398 | Down                 | <i>Apis mellifera</i> similar to CG17758-PA (LOC410820)                                                        |
| CUST_6722_Pi416562355 | GI:110762963 | 3.204                    | 4.358                    | 0.449 | Down                 | <i>Apis mellifera</i> tetratricopeptide repeat protein 12-like (LOC727151)                                     |
| CUST_2404_Pi416562355 | GI:110751051 | 4.505                    | 5.784                    | 0.412 | Down                 | <i>Apis mellifera</i> RING-box protein 1A (Roc1a)                                                              |
| CUST_3346_Pi416562355 | GI:110756274 | 5.268                    | 6.398                    | 0.457 | Down                 | <i>Apis mellifera</i> similar to CG14145-PA (LOC725063)                                                        |
| CUST_2124_Pi416562355 | GI:110750096 | 3.805                    | 4.928                    | 0.459 | Down                 | <i>Apis mellifera</i> hypothetical protein LOC725716 (LOC725716)                                               |
| CUST_1157_Pi416568369 | \            | 1.945                    | 3.574                    | 0.323 | Down                 | \                                                                                                              |
| CUST_8499_Pi416562355 | GI:110768055 | 5.426                    | 7.288                    | 0.275 | Down                 | <i>Apis mellifera</i> acyl-CoA Delta(11) desaturase (LOC412166)                                                |
| CUST_1359_Pi416562355 | GI:90194181  | 4.394                    | 5.561                    | 0.445 | Down                 | <i>Apis mellifera</i> OBP11                                                                                    |
| CUST_8539_Pi416562355 | GI:110768198 | 9.625                    | 11.215                   | 0.332 | Down                 | <i>Apis mellifera</i> ATP synthase lipid-binding protein, mitochondrial-like, transcript variant 1 (LOC409148) |
| CUST_1318_Pi416568369 | \            | 3.933                    | 6.171                    | 0.212 | Down                 | \                                                                                                              |
| CUST_893_Pi416562355  | GI:66526280  | 4.648                    | 5.817                    | 0.445 | Down                 | <i>Apis mellifera</i> scavenger receptor class B member 1 (LOC413408)                                          |
| CUST_1560_Pi416568369 | \            | 2.838                    | 4.027                    | 0.439 | Down                 | \                                                                                                              |
| CUST_8388_Pi416562355 | GI:110767591 | 4.901                    | 5.973                    | 0.476 | Down                 | <i>Apis mellifera</i> CMP-sialic acid transporter 1 (LOC552387)                                                |
| CUST_779_Pi416568369  | \            | 2.884                    | 3.947                    | 0.479 | Down                 | \                                                                                                              |

| probe_ID              | Accessions   | avg_HRJB<br>(log2signal) | avg_LRJB<br>(log2signal) | Ratio | Expression<br>change | Target Description                                                                                            |
|-----------------------|--------------|--------------------------|--------------------------|-------|----------------------|---------------------------------------------------------------------------------------------------------------|
| CUST_930_PI416568369  | \            | 2.754                    | 3.785                    | 0.490 | Down                 | \                                                                                                             |
| CUST_6363_PI416562355 | GI:110762248 | 2.976                    | 3.997                    | 0.493 | Down                 | <i>Apis mellifera</i> coiled-coil domain-containing protein 113 (LOC726613)                                   |
| CUST_4332_PI416562355 | GI:110758258 | 3.197                    | 4.446                    | 0.421 | Down                 | <i>Apis mellifera</i> aminopeptidase N-like (LOC551180)                                                       |
| CUST_515_PI416568369  | \            | 2.400                    | 3.509                    | 0.464 | Down                 | \                                                                                                             |
| CUST_3016_PI416562355 | GI:110755682 | 2.766                    | 3.850                    | 0.472 | Down                 | <i>Apis mellifera</i> transcriptional activator cubitus interruptus (LOC551746)                               |
| CUST_6846_PI416562355 | GI:110763230 | 4.578                    | 5.803                    | 0.428 | Down                 | <i>Apis mellifera</i> similar to U1 small nuclear ribonucleoprotein A (LOC409948)                             |
| CUST_2412_PI416562355 | GI:110751064 | 2.711                    | 3.909                    | 0.436 | Down                 | <i>Apis mellifera</i> LIM domain only protein 3-like (LOC724851)                                              |
| CUST_843_PI416568369  | \            | 2.595                    | 3.604                    | 0.497 | Down                 | \                                                                                                             |
| CUST_6335_PI416562355 | GI:110762198 | 4.302                    | 5.345                    | 0.485 | Down                 | <i>Apis mellifera</i> hemicentin-2-like (LOC725619)                                                           |
| CUST_823_PI416568369  | \            | 2.926                    | 3.956                    | 0.490 | Down                 | \                                                                                                             |
| CUST_615_PI416568369  | \            | 2.928                    | 3.975                    | 0.484 | Down                 | \                                                                                                             |
| CUST_8257_PI416562355 | GI:110767159 | 2.392                    | 3.559                    | 0.445 | Down                 | <i>Apis mellifera</i> similar to CG5278-PA (LOC727002)                                                        |
| CUST_2899_PI416562355 | GI:110755411 | 2.713                    | 3.813                    | 0.466 | Down                 | <i>Apis mellifera</i> similar to CG7466-PA (LOC725863)                                                        |
| CUST_6350_PI416562355 | GI:110762224 | 3.319                    | 4.372                    | 0.482 | Down                 | <i>Apis mellifera</i> similar to Ca <sup>2+</sup> -channel-protein--subunit CG6320-PD, isoform D, (LOC408430) |
| CUST_3108_PI416562355 | GI:110755849 | 7.141                    | 8.197                    | 0.481 | Down                 | <i>Apis mellifera</i> myosin 18 (Myo18)                                                                       |
| CUST_510_PI416568369  | \            | 2.645                    | 3.835                    | 0.438 | Down                 | \                                                                                                             |
| CUST_3452_PI416562355 | GI:110756526 | 2.744                    | 3.959                    | 0.431 | Down                 | <i>Apis mellifera</i> cilia- and flagella-associated protein 57 (LOC411073)                                   |
| CUST_9030_PI416562355 | GI:110772423 | 5.160                    | 6.274                    | 0.462 | Down                 | <i>Apis mellifera</i> similar to rab3-GEF CG5627-PA (LOC727374)                                               |
| CUST_378_PI416568369  | \            | 2.753                    | 4.268                    | 0.350 | Down                 | \                                                                                                             |
| CUST_1673_PI416568369 | \            | 5.205                    | 6.388                    | 0.440 | Down                 | \                                                                                                             |
| CUST_7636_PI416562355 | GI:110764820 | 5.055                    | 6.301                    | 0.422 | Down                 | <i>Apis mellifera</i> peroxisomal membrane protein PEX13-like (LOC727257)                                     |
| CUST_4151_PI416562355 | GI:110757849 | 2.736                    | 4.306                    | 0.337 | Down                 | <i>Apis mellifera</i> similar to adenylate kinase 7 (LOC411160)                                               |
| CUST_854_PI416562355  | GI:66524123  | 2.410                    | 3.801                    | 0.381 | Down                 | <i>Apis mellifera</i> carboxypeptidase B-like (LOC551327)                                                     |

| probe_ID              | Accessions   | avg_HRJB<br>(log2signal) | avg_LRJB<br>(log2signal) | Ratio | Expression<br>change | Target Description                                                                          |
|-----------------------|--------------|--------------------------|--------------------------|-------|----------------------|---------------------------------------------------------------------------------------------|
| CUST_183_Pi416562355  | GI:47157063  | 5.151                    | 6.448                    | 0.407 | Down                 | <i>Apis mellifera</i> ligustica ubiquinone biosynthesis protein COQ7-like protein (clk-1)   |
| CUST_6101_Pi416562355 | GI:110761737 | 3.189                    | 4.289                    | 0.467 | Down                 | <i>Apis mellifera</i> leucine-rich repeat-containing protein 15 (LOC410373)                 |
| CUST_3382_Pi416562355 | GI:110756385 | 4.821                    | 5.986                    | 0.446 | Down                 | <i>Apis mellifera</i> zinc finger protein 816-like (LOC724513)                              |
| CUST_1563_Pi416568369 | \            | 2.327                    | 3.413                    | 0.471 | Down                 | \                                                                                           |
| CUST_2919_Pi416562355 | GI:110755446 | 6.429                    | 7.444                    | 0.495 | Down                 | <i>Apis mellifera</i> succinate dehydrogenase [ubiquinone] flavoprotein subunit (LOC408734) |
| CUST_350_Pi416568369  | \            | 2.730                    | 3.755                    | 0.492 | Down                 | \                                                                                           |
| CUST_818_Pi416562355  | GI:66522186  | 3.305                    | 4.584                    | 0.412 | Down                 | <i>Apis mellifera</i> beta-1,3-galactosyltransferase 1-like (LOC552398)                     |
| CUST_3023_Pi416562355 | GI:110755693 | 5.053                    | 6.406                    | 0.392 | Down                 | <i>Apis mellifera</i> ADAM 17-like protease (LOC551599)                                     |
| CUST_6838_Pi416562355 | GI:110763216 | 3.362                    | 4.569                    | 0.433 | Down                 | <i>Apis mellifera</i> ATP-dependent DNA helicase Q5-like (LOC725113)                        |
| CUST_98_Pi416568369   | \            | 2.193                    | 3.222                    | 0.490 | Down                 | \                                                                                           |
| CUST_2264_Pi416562355 | GI:110750794 | 4.807                    | 6.408                    | 0.330 | Down                 | <i>Apis mellifera</i> arrestin domain-containing protein 4 (LOC410896)                      |
| CUST_4001_Pi416562355 | GI:110757561 | 4.933                    | 5.966                    | 0.489 | Down                 | <i>Apis mellifera</i> n-acetyltransferase 10-like (LOC724656)                               |
| CUST_772_Pi416568369  | \            | 2.634                    | 3.980                    | 0.393 | Down                 | \                                                                                           |
| CUST_4173_Pi416562355 | GI:110757935 | 2.472                    | 3.640                    | 0.445 | Down                 | <i>Apis mellifera</i> peroxidase (Pxd)                                                      |
| CUST_6512_Pi416562355 | GI:110762589 | 4.021                    | 5.066                    | 0.485 | Down                 | <i>Apis mellifera</i> similar to Transcriptional regulator ATRX homolog (LOC724593)         |
| CUST_2640_Pi416562355 | GI:110754955 | 3.294                    | 4.300                    | 0.498 | Down                 | <i>Apis mellifera</i> hypothetical protein LOC724650 (LOC724650)                            |
| CUST_2327_Pi416562355 | GI:110750909 | 2.424                    | 3.920                    | 0.355 | Down                 | <i>Apis mellifera</i> hypothetical protein LOC410882, transcript variant 1 (LOC410882)      |
| CUST_8951_Pi416562355 | GI:110771666 | 2.136                    | 3.501                    | 0.388 | Down                 | <i>Apis mellifera</i> hypothetical protein LOC726809 (LOC726809)                            |
| CUST_8372_Pi416562355 | GI:110767542 | 6.067                    | 7.427                    | 0.390 | Down                 | <i>Apis mellifera</i> similar to Probable cytochrome P450 6a14 (CYPVIA14) (LOC552418)       |
| CUST_137_Pi416568369  | \            | 1.608                    | 3.092                    | 0.358 | Down                 | \                                                                                           |
| CUST_1266_Pi416562355 | GI:66564902  | 3.268                    | 4.382                    | 0.462 | Down                 | <i>Apis mellifera</i> serine/threonine-protein kinase SIK2 (LOC413736)                      |
| CUST_8027_Pi416562355 | GI:110766294 | 3.827                    | 4.987                    | 0.448 | Down                 | <i>Apis mellifera</i> lachesin-like (LOC725840)                                             |

| probe_ID              | Accessions   | avg_HRJB<br>(log2signal) | avg_LRJB<br>(log2signal) | Ratio | Expression<br>change | Target Description                                                                        |
|-----------------------|--------------|--------------------------|--------------------------|-------|----------------------|-------------------------------------------------------------------------------------------|
| CUST_8361_PI416562355 | GI:110767492 | 5.120                    | 6.190                    | 0.476 | Down                 | <i>Apis mellifera</i> cardioacceleratory peptide receptor (LOC726935)                     |
| CUST_8770_PI416562355 | GI:110769829 | 3.838                    | 4.906                    | 0.477 | Down                 | <i>Apis mellifera</i> probable cytochrome P450 6a13 (LOC727598)                           |
| CUST_461_PI416562355  | GI:66504571  | 3.070                    | 4.231                    | 0.447 | Down                 | <i>Apis mellifera</i> similar to CG18265-PA (LOC410861)                                   |
| CUST_388_PI416568369  | \            | 3.014                    | 4.049                    | 0.488 | Down                 | \                                                                                         |
| CUST_979_PI416568369  | \            | 2.758                    | 3.877                    | 0.460 | Down                 | \                                                                                         |
| CUST_817_PI416568369  | \            | 2.267                    | 3.309                    | 0.486 | Down                 | \                                                                                         |
| CUST_7904_PI416562355 | GI:110765951 | 3.024                    | 4.066                    | 0.486 | Down                 | <i>Apis mellifera</i> cytochrome P450 6A1 (LOC413908)                                     |
| CUST_5017_PI416562355 | GI:110759606 | 2.516                    | 3.663                    | 0.452 | Down                 | <i>Apis mellifera</i> hypothetical protein LOC724572 (LOC724572)                          |
| CUST_6841_PI416562355 | GI:110763221 | 4.645                    | 5.885                    | 0.423 | Down                 | <i>Apis mellifera</i> choline/ethanolaminephosphotransferase 1-like (LOC552795)           |
| CUST_3733_PI416562355 | GI:110757021 | 3.204                    | 4.478                    | 0.413 | Down                 | <i>Apis mellifera</i> hypothetical protein LOC726189 (LOC726189)                          |
| CUST_8809_PI416562355 | GI:110770106 | 2.664                    | 3.787                    | 0.459 | Down                 | <i>Apis mellifera</i> RNA-binding protein 1 (LOC727349)                                   |
| CUST_1108_PI416568369 | \            | 2.512                    | 3.539                    | 0.491 | Down                 | \                                                                                         |
| CUST_3153_PI416562355 | GI:110755933 | 7.934                    | 9.146                    | 0.432 | Down                 | <i>Apis mellifera</i> uncharacterized LOC408807 (LOC408807)                               |
| CUST_6146_PI416562355 | GI:110761812 | 3.078                    | 4.193                    | 0.462 | Down                 | <i>Apis mellifera</i> PEST proteolytic signal-containing nuclear protein-like (LOC726782) |
| CUST_6055_PI416562355 | GI:110761656 | 2.633                    | 3.642                    | 0.497 | Down                 | <i>Apis mellifera</i> basic helix-loop-helix neural transcription factor TAP (LOC725085)  |
| CUST_1168_PI416568369 | \            | 2.917                    | 3.921                    | 0.499 | Down                 | \                                                                                         |
| CUST_5175_PI416562355 | GI:110759959 | 3.372                    | 4.403                    | 0.489 | Down                 | <i>Apis mellifera</i> matrix metalloproteinase-14 (LOC409868)                             |
| CUST_484_PI416568369  | \            | 2.939                    | 3.948                    | 0.497 | Down                 | \                                                                                         |
| CUST_537_PI416568369  | \            | 6.321                    | 7.589                    | 0.415 | Down                 | \                                                                                         |
| CUST_730_PI416568369  | \            | 2.309                    | 3.715                    | 0.377 | Down                 | \                                                                                         |
| CUST_1229_PI416568369 | \            | 2.012                    | 3.064                    | 0.482 | Down                 | \                                                                                         |
| CUST_5247_PI416562355 | GI:110760094 | 6.151                    | 7.164                    | 0.495 | Down                 | <i>Apis mellifera</i> small nuclear ribonucleoprotein F, transcript variant 1 (DeBB)      |
| CUST_847_PI416562355  | GI:66523769  | 2.722                    | 3.781                    | 0.480 | Down                 | <i>Apis mellifera</i> uncharacterized oxidoreductase YjmC (LOC410520)                     |
| CUST_1262_PI416562355 | GI:66564816  | 6.498                    | 7.572                    | 0.475 | Down                 | <i>Apis mellifera</i> methyltransferase-like protein 13 (LOC412624)                       |

| probe_ID              | Accessions   | avg_HRJB<br>(log2signal) | avg_LRJB<br>(log2signal) | Ratio | Expression<br>change | Target Description                                                                                        |
|-----------------------|--------------|--------------------------|--------------------------|-------|----------------------|-----------------------------------------------------------------------------------------------------------|
| CUST_368_Pi416568369  | \            | 2.519                    | 3.528                    | 0.497 | Down                 | \                                                                                                         |
| CUST_7101_Pi416562355 | GI:110763677 | 9.729                    | 10.948                   | 0.430 | Down                 | <i>Apis mellifera</i> ribosomal protein L26, transcript variant 1 (RpL26)                                 |
| CUST_9126_Pi416562355 | GI:110773257 | 2.273                    | 3.451                    | 0.442 | Down                 | <i>Apis mellifera</i> similar to glutathione reductase 1 (LOC727640)                                      |
| CUST_6166_Pi416562355 | GI:110761845 | 3.214                    | 4.446                    | 0.426 | Down                 | <i>Apis mellifera</i> uncharacterized LOC724959 (LOC724959)                                               |
| CUST_8854_Pi416562355 | GI:110770770 | 2.148                    | 3.156                    | 0.497 | Down                 | <i>Apis mellifera</i> hypothetical protein LOC727557 (LOC727557)                                          |
| CUST_888_Pi416568369  | \            | 3.013                    | 4.015                    | 0.499 | Down                 | \                                                                                                         |
| CUST_4055_Pi416562355 | GI:110757666 | 2.645                    | 3.654                    | 0.497 | Down                 | <i>Apis mellifera</i> similar to ADAM metallopeptidase with thrombospondin type 1 motif, (LOC724351)      |
| CUST_4606_Pi416562355 | GI:110758815 | 6.043                    | 7.105                    | 0.479 | Down                 | <i>Apis mellifera</i> ubiquinone biosynthesis O-methyltransferase, mitochondrial (LOC412082)              |
| CUST_7050_Pi416562355 | GI:110763589 | 6.603                    | 7.680                    | 0.474 | Down                 | <i>Apis mellifera</i> similar to grapes CG17161-PA, isoform A, transcript variant 1 (LOC413964)           |
| CUST_3768_Pi416562355 | GI:110757082 | 6.021                    | 7.304                    | 0.411 | Down                 | <i>Apis mellifera</i> annexin-B9-like (LOC412487)                                                         |
| CUST_3104_Pi416562355 | GI:110755841 | 5.053                    | 6.156                    | 0.466 | Down                 | <i>Apis mellifera</i> protein FAM114A2 (LOC551672)                                                        |
| CUST_6057_Pi416562355 | GI:110761660 | 2.661                    | 4.203                    | 0.343 | Down                 | <i>Apis mellifera</i> hypothetical protein LOC725198 (LOC725198)                                          |
| CUST_7327_Pi416562355 | GI:110764119 | 2.113                    | 3.217                    | 0.465 | Down                 | <i>Apis mellifera</i> spermine oxidase-like (LOC725007)                                                   |
| CUST_8042_Pi416562355 | GI:110766327 | 6.228                    | 7.421                    | 0.437 | Down                 | <i>Apis mellifera</i> cleavage and polyadenylation specificity factor subunit CG7185 ortholog (LOC551973) |
| CUST_8970_Pi416562355 | GI:110771859 | 4.747                    | 5.870                    | 0.459 | Down                 | <i>Apis mellifera</i> similar to Glycerol-3-phosphate dehydrogenase [NAD+], (LOC727482)                   |
| CUST_2509_Pi416562355 | GI:110751231 | 2.931                    | 3.961                    | 0.490 | Down                 | <i>Apis mellifera</i> similar to CG17761-PA (LOC725010)                                                   |
| CUST_3237_Pi416562355 | GI:110756085 | 2.814                    | 3.864                    | 0.483 | Down                 | <i>Apis mellifera</i> chameau (chm)                                                                       |
| CUST_1085_Pi416568369 | \            | 2.628                    | 3.703                    | 0.475 | Down                 | \                                                                                                         |
| CUST_503_Pi416568369  | \            | 3.058                    | 4.801                    | 0.299 | Down                 | \                                                                                                         |
| CUST_606_Pi416568369  | \            | 2.683                    | 3.748                    | 0.478 | Down                 | \                                                                                                         |

| probe_ID              | Accessions   | avg_HRJB<br>(log2signal) | avg_LRJB<br>(log2signal) | Ratio | Expression<br>change | Target Description                                                                               |
|-----------------------|--------------|--------------------------|--------------------------|-------|----------------------|--------------------------------------------------------------------------------------------------|
| CUST_119_P1416568369  | \            | 2.948                    | 4.053                    | 0.465 | Down                 | \                                                                                                |
| CUST_8788_P1416562355 | GI:110769967 | 6.101                    | 7.554                    | 0.365 | Down                 | <i>Apis mellifera</i> probable ATP-dependent RNA helicase DDX17-like (LOC726768)                 |
| CUST_2655_P1416562355 | GI:110754983 | 2.744                    | 3.762                    | 0.494 | Down                 | <i>Apis mellifera</i> uncharacterized LOC725791 (LOC725791)                                      |
| CUST_7792_P1416562355 | GI:110765247 | 5.516                    | 6.622                    | 0.465 | Down                 | <i>Apis mellifera</i> hypothetical protein LOC551908, transcript variant 2 (LOC551908)           |
| CUST_4285_P1416562355 | GI:110758165 | 7.027                    | 8.147                    | 0.460 | Down                 | <i>Apis mellifera</i> similar to sallimus CG1915-PC, isoform C (LOC551181)                       |
| CUST_9077_P1416562355 | GI:110772836 | 5.130                    | 6.721                    | 0.332 | Down                 | <i>Apis mellifera</i> similar to CG5537-PA (LOC727016)                                           |
| CUST_6087_P1416562355 | GI:110761715 | 3.685                    | 4.933                    | 0.421 | Down                 | <i>Apis mellifera</i> hypothetical protein LOC411361 (LOC411361)                                 |
| CUST_62_P1416562355   | GI:12659340  | 4.045                    | 5.702                    | 0.317 | Down                 | <i>Apis mellifera</i> odorant binding protein (OBP-8)                                            |
| CUST_8103_P1416562355 | GI:110766502 | 5.981                    | 7.123                    | 0.453 | Down                 | <i>Apis mellifera</i> renin receptor-like (LOC552228)                                            |
| CUST_1785_P1416562355 | GI:110749395 | 2.691                    | 3.704                    | 0.496 | Down                 | <i>Apis mellifera</i> ecdysis triggering hormone receptor (Ethr)                                 |
| CUST_9195_P1416562355 | GI:110773944 | 4.260                    | 5.284                    | 0.492 | Down                 | <i>Apis mellifera</i> similar to Cholinesterase precursor (LOC727064)                            |
| CUST_6075_P1416562355 | GI:110761695 | 9.868                    | 11.045                   | 0.442 | Down                 | <i>Apis mellifera</i> ribosomal protein S3A (RpS3A)                                              |
| CUST_760_P1416562355  | GI:66519406  | 5.158                    | 6.190                    | 0.489 | Down                 | <i>Apis mellifera</i> Smad anchor for receptor activation (Sara)                                 |
| CUST_5229_P1416562355 | GI:110760063 | 6.365                    | 7.369                    | 0.499 | Down                 | <i>Apis mellifera</i> similar to SET domain containing 3 (LOC410155)                             |
| CUST_9549_P1416562355 | GI:110777719 | 3.092                    | 4.315                    | 0.428 | Down                 | <i>Apis mellifera</i> hypothetical protein LOC726008 (LOC726008)                                 |
| CUST_1750_P1416562355 | GI:110749329 | 6.083                    | 7.210                    | 0.458 | Down                 | <i>Apis mellifera</i> 6-phosphogluconolactonase (LOC551785)                                      |
| CUST_7069_P1416562355 | GI:110763621 | 5.701                    | 6.711                    | 0.496 | Down                 | <i>Apis mellifera</i> phosphatidylinositol 4-kinase II beta (Pi4k2b)                             |
| CUST_6959_P1416562355 | GI:110763430 | 9.503                    | 10.601                   | 0.467 | Down                 | <i>Apis mellifera</i> chymotrypsin inhibitor (LOC725114)                                         |
| CUST_639_P1416562355  | GI:66513917  | 4.587                    | 5.613                    | 0.491 | Down                 | <i>Apis mellifera</i> uncharacterized LOC413618 (LOC413618)                                      |
| CUST_2251_P1416562355 | GI:110750761 | 6.800                    | 7.867                    | 0.477 | Down                 | <i>Apis mellifera</i> similar to Protein lethal(2)essential for life (Protein Efl21) (LOC724405) |
| CUST_2602_P1416562355 | GI:110751392 | 7.032                    | 8.057                    | 0.491 | Down                 | <i>Apis mellifera</i> GPI transamidase component PIG-T (LOC410132)                               |
| CUST_1751_P1416562355 | GI:110749330 | 5.751                    | 6.868                    | 0.461 | Down                 | <i>Apis mellifera</i> protein ABHD13 (LOC412636)                                                 |
| CUST_12_P1416562355   | GI:562091    | 8.315                    | 9.779                    | 0.363 | Down                 | <i>Apis mellifera</i> hymenoptaecin                                                              |
| CUST_5950_P1416562355 | GI:110761392 | 8.007                    | 9.115                    | 0.464 | Down                 | <i>Apis mellifera</i> histone deacetylase 5 (LOC408331)                                          |



| probe_ID              | Accessions   | avg_HRJB<br>(log2signal) | avg_LRJB<br>(log2signal) | Ratio | Expression<br>change | Target Description                                                                        |
|-----------------------|--------------|--------------------------|--------------------------|-------|----------------------|-------------------------------------------------------------------------------------------|
| CUST_7730_P1416562355 | GI:110765056 | 5.890                    | 7.041                    | 0.450 | Down                 | <i>Apis mellifera</i> pitchoune (pit)                                                     |
| CUST_2738_P1416562355 | GI:110755132 | 6.586                    | 7.956                    | 0.387 | Down                 | <i>Apis mellifera</i> ubiquitin-protein ligase E3B-like (LOC408749)                       |
| CUST_56_P1416568369   | \            | 6.917                    | 8.027                    | 0.463 | Down                 | \                                                                                         |
| CUST_7211_P1416562355 | GI:110763907 | 8.471                    | 9.567                    | 0.468 | Down                 | <i>Apis mellifera</i> similar to CG16791-PA (LOC408555)                                   |
| CUST_5629_P1416562355 | GI:110760833 | 8.498                    | 9.917                    | 0.374 | Down                 | <i>Apis mellifera</i> 26S protease regulatory subunit 8, transcript variant 1 (LOC550794) |
| CUST_3248_P1416562355 | GI:110756105 | 6.745                    | 8.330                    | 0.333 | Down                 | <i>Apis mellifera</i> scavenger receptor class B, type 9 (SCR-B9), transcript variant X6  |
| CUST_3324_P1416562355 | GI:110756237 | 7.953                    | 8.985                    | 0.489 | Down                 | <i>Apis mellifera</i> V-type proton ATPase subunit G (LOC551961)                          |
| CUST_3182_P1416562355 | GI:110755986 | 3.592                    | 4.725                    | 0.456 | Down                 | <i>Apis mellifera</i> hypothetical protein LOC726023 (LOC726023)                          |
| CUST_6505_P1416562355 | GI:110762576 | 3.844                    | 5.170                    | 0.399 | Down                 | <i>Apis mellifera</i> hypothetical protein LOC724121, transcript variant 1 (LOC724121)    |
| CUST_13_P1416562355   | GI:882407    | 10.522                   | 12.181                   | 0.317 | Down                 | <i>Apis mellifera</i> long-wavelength rhodopsin                                           |
| CUST_3620_P1416562355 | GI:110756821 | 8.063                    | 9.114                    | 0.483 | Down                 | <i>Apis mellifera</i> similar to Protein yippee-like 1 (LOC408838)                        |
| CUST_780_P1416562355  | GI:66520255  | 6.170                    | 7.320                    | 0.451 | Down                 | <i>Apis mellifera</i> electron transfer flavoprotein subunit beta (LOC410308)             |
| CUST_762_P1416568369  | \            | 3.018                    | 4.144                    | 0.458 | Down                 | \                                                                                         |

Note: "\" represent gene, without publishing in NCBI
