# Supplementary material for: Identification of genes related to high royal jelly production in the honey bee (Apis mellifera) using microarray analysis
Source: PubMed Central journal article supplement (PMC5738612; doi:10.1590/1678-4685-gmb-2017-0013), 2017-10-02
Supplement: 1415-4757-gmb-1678-4685-GMB-2017-0013-Suppl05.pdf [file 1415-4757-gmb-1678-4685-GMB-2017-0013-Suppl05.pdf]

**Supplementary Material to “Identification of genes related to high  
royal jelly production in the honey bee  
(*Apis mellifera*) using microarray analysis”**

**Table S5.** KEGG analysis of the differently expressed genes in the HRJBs and LRJBs samples

| KEGG pathway | description                                     | Associated genes- NCBI ID                     |
|--------------|-------------------------------------------------|-----------------------------------------------|
| Ame 00510    | N-Glycan biosynthesis                           | LOC412489                                     |
| Ame 04310    | Wnt signaling pathway                           | LOC408691                                     |
| Ame 00130    | Ubiquinone and other terpenoid-<br>biosynthesis | LOC412082                                     |
| Ame 04070    | Phosphatidylinositol signaling system           | LOC551709, LOC725812                          |
| Ame 00330    | Arginine and proline metabolism                 | LOC551709, LOC725812                          |
| Ame 04146    | Peroxisome                                      | LOC412541, LOC727257                          |
| Ame 03040    | Spliceosome                                     | LOC726768, LOC725880                          |
| Ame 01040    | Biosynthesis of unsaturated fatty acids         | LOC412166                                     |
| Ame 03050    | Proteasome                                      | LOC550794, LOC479802                          |
| Ame 00260    | Glycine, serine and threonine metabolism        | LOC552565, LOC410550                          |
| Ame 00360    | Phenylalanine metabolism                        | LOC411852                                     |
| Ame 00860    | Porphyry and chlorophyll metabolism             | LOC409103                                     |
| Ame 00230    | Purine metabolism                               | LOC412573                                     |
| Ame 00670    | One carbon pool by folate                       | LOC410550                                     |
| Ame 04144    | Endocytosis                                     | LOC413457, LOC408786, LOC724000               |
| Ame 00030    | Pentose phosphate pathway                       | LOC551785                                     |
| Ame 04340    | Hedgehog signaling pathway                      | LOC551746, LOC726929                          |
| Ame 04710    | Circadian rhythm-mammal                         | LOC408691                                     |
| Ame 00071    | Fatty acid metabolism                           | LOC412541                                     |
| Ame 04650    | Natural killer cell mediated cytotoxicity       | LOC551709, LOC412172                          |
| Ame 00531    | Glycosaminoglycan degradation                   | LOC550884                                     |
| Ame 03010    | Ribosome                                        | LOC413296, LOC408515, LOC725147,<br>LOC725943 |
| Ame 04141    | Protein processing in endoplasmic reticulum     | LOC408691                                     |
| Ame 00100    | Steroid biosynthesis                            | LOC409360                                     |
| Ame 00564    | Glycerophospholipid metabolism                  | LOC411525                                     |
| Ame 03420    | Nucleotide excision repair                      | LOC408691                                     |
| Ame 00270    | Cysteine and methionine metabolism              | LOC551762                                     |
| Ame 00052    | Galactose metabolism                            | LOC411633                                     |
| Ame 00520    | Amino sugar and nucleotide sugar metabolism     | LOC411633                                     |

| KEGG pathway | description                                              | Associated genes- NCBI ID                     |
|--------------|----------------------------------------------------------|-----------------------------------------------|
| Ame 03018    | RNA degradation                                          | LOC409384                                     |
| Ame 00910    | Nitrogen metabolism                                      | LOC410550                                     |
| Ame 00601    | Glycosphingolipid biosynthesis-lacto<br>neolacto series  | LOC552398                                     |
| Ame 00970    | Aminoacyl-tRNA biosynthesis                              | LOC725136                                     |
| Ame 04350    | TGF-beta signaling pathway                               | LOC413457, LOC408691                          |
| Ame 00562    | Inositol phosphate metabolism                            | LOC551709, LOC725812                          |
| Ame 03013    | RNA transport                                            | LOC725227                                     |
| Ame 00190    | Oxidative phosphorylation                                | LOC551961, LOC409148, LOC409103,<br>LOC726777 |
| Ame 02010    | ABC transporters                                         | LOC413947                                     |
| Ame 04145    | Phagosome                                                | LOC551961                                     |
| Ame 04142    | Lysosome                                                 | LOC550884                                     |
| Ame 04512    | ECM-receptor interaction                                 | LOC412941                                     |
| Ame 00240    | Pyrimidine metabolism                                    | LOC552148                                     |
| Ame 03008    | Ribosome biogenesis in eukaryotes                        | LOC413196, LOC724656, LOC724000               |
| Ame 04080    | Neuroactive ligand-receptor interaction                  | LOC411611                                     |
| Ame 04120    | Ubiquitin mediated proteolysis                           | LOC408749, LOC408691                          |
| Ame 00563    | Glycosylphosphatidylinositol(GPI)-anchor<br>biosynthesis | LOC410132                                     |
